# Supplementary material for: CRISPR/Cas9-based coronal nanostructures for targeted mitochondria single molecule imaging
Source: Royal Society of Chemistry journal article supplement (doi:10.1039/d2sc03329a), 2022-01-01
Supplement: d2sc03329a1.pdf [file d2sc03329a1.pdf]

## Supporting Information

# CRISPR/Cas9-based Coronal Nanostructures for Targeted Mitochondria Single Molecule Imaging

Xuan Zhao,<sup>a</sup> Na Na,<sup>a</sup> and Jin Ouyang\*<sup>a</sup>

<sup>a</sup>Key Laboratory of Theoretical and Computational Photochemistry, Ministry of Education, College of Chemistry, Beijing Normal University, Beijing 100875, China.

**\*Corresponding author:**

Jin Ouyang (jinoyang@bnu.edu.cn) Key Laboratory of Theoretical and Computational Photochemistry, Ministry of Education, College of Chemistry, Beijing Normal University, Beijing 100875, China.

---

## Table of Contents

|                                                                        |   |
|------------------------------------------------------------------------|---|
| Table S1 DNA and RNA sequences used in this study.....                 | 3 |
| Figure S1 FT-IR spectra of PDNCs .....                                 | 4 |
| Figure S2 Cellular uptake of PDNCs .....                               | 4 |
| Figure S3 Schematic of the multi-input design of AND logic gates.....  | 5 |
| Figure S4 The cleavage kinetics.....                                   | 5 |
| Figure S5 MTT assay .....                                              | 6 |
| Figure S6 The significance of Cas protein .....                        | 6 |
| Figure S7 Discrimination of different cells.....                       | 7 |
| Figure S8 Effect of Transfer Efficiency on Fluorescence Intensity..... | 7 |

**Table S1** DNA and RNA sequences used in this study.

| Primer        | Sequence (5' - 3')                                                                                           |
|---------------|--------------------------------------------------------------------------------------------------------------|
| H1            | <b>HOOC-CCC CCT CAA CAT CAG TCT GAT AAG CTA</b>                                                              |
| H2            | <b>GAC CGG G/iBHQ1dT/TC ATC TAA TGG AT/iTAMdT/C CCG GTC TAG CTT<br/>ATC AGA C</b>                            |
| S1            | <b>HOOC- CCC CCA CAC AAA TTC GGT TCT ACA GGG</b>                                                             |
| S2            | <b>CGG GAT CCA TTA GAT GAC CCG GTC AGT TAT CAG CAC CCT GTA<br/>GAA CGG</b>                                   |
| miRNA-21      | <b>UAG CUU AUC AGA CUG AUG UUG A</b>                                                                         |
| miRNA-10b     | <b>CCC UGU AGA ACC GAA UUU GUG U</b>                                                                         |
| miRNA-21 DNA  | <b>TAG CTT ATC AGA CTG ATG TTG A</b>                                                                         |
| miRNA-10b DNA | <b>CCC TGT AGA ACC GAA TTT GTG T</b>                                                                         |
| crRNA         | <b>UAA CUG ACC GGG UCA UCU AAG UUU UAG AGC UAU GCU GUU UU</b>                                                |
| tracrRNA      | <b>AAA ACA GCA UAG CAA GUU AAA AUA AGG CUA GUC CGU UAU CAA<br/>CUU GAA AAA GUG GCA CCG AGU CGG UGC UUC G</b> |
| crRNA-DNA     | <b>TAA CTG ACC GGG TCA TCT AAG TTT TAG AGC TAT GCT GTT TT</b>                                                |
| tracrRNA-DNA  | <b>AAA ACA GCA TAG CAA GTT AAA ATA AGG CTA GTC CGT TAT CAA<br/>CTT GAA AAA GTG GCA CCG AGT CGG TGC TTC G</b> |
| miRNA-let-7a  | <b>UGA GGU AGU AGG UUG UAU AGU U</b>                                                                         |
| miRNA-222     | <b>CUC AGU AGC CAG UGU AGA UCC U</b>                                                                         |
| miRNA-141     | <b>UAA CAC UGU CUG GUA AAG AUG G</b>                                                                         |
| miRNA-107     | <b>AGC AGC AUU GUA CAG GGC UAU CA</b>                                                                        |
| miRNA-155     | <b>UUA AUG CUA AUC GUG AUA GGG GU</b>                                                                        |

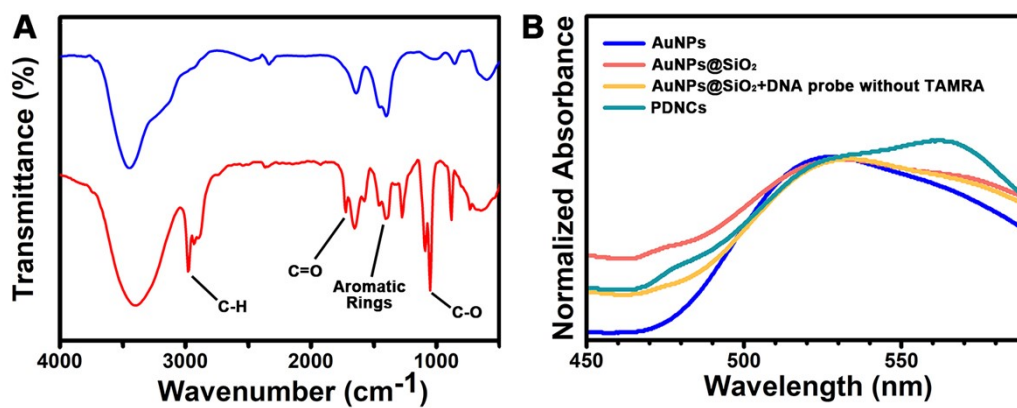

**Figure S1** (A) FT-IR spectra of AuNPs (blue line) and the coronal structure nanoparticles (red line). The stretching and breathing vibration peaks of the groups were marked in the figure. (B) Absorption spectra of nanomaterials in different stages.

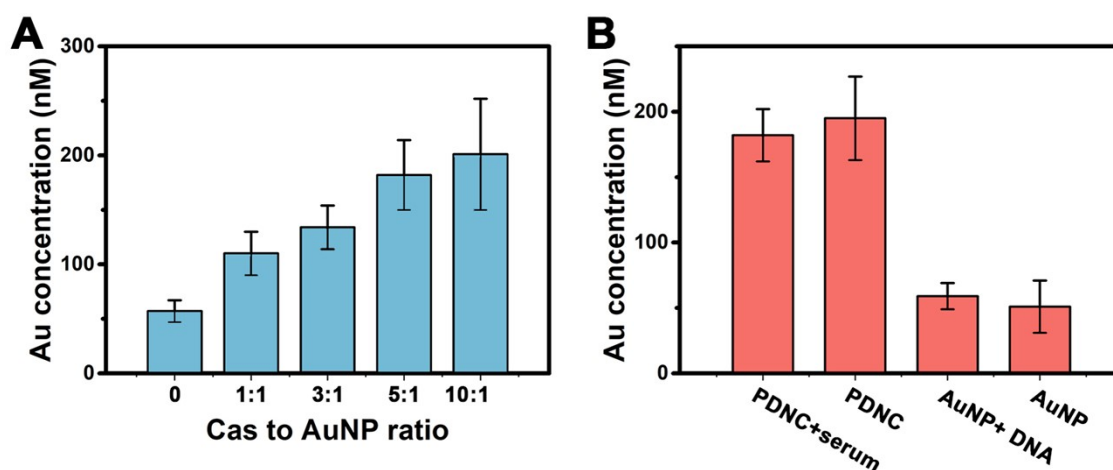

**Figure S2** Cellular uptake of PDNCs. Quantification of cell uptake by measuring intracellular AuNPs using ICP-MS. MCF-7 cells were incubated for 4 h with PDNCs, which had (A) different Cas to AuNP ratio and (B) different environment.

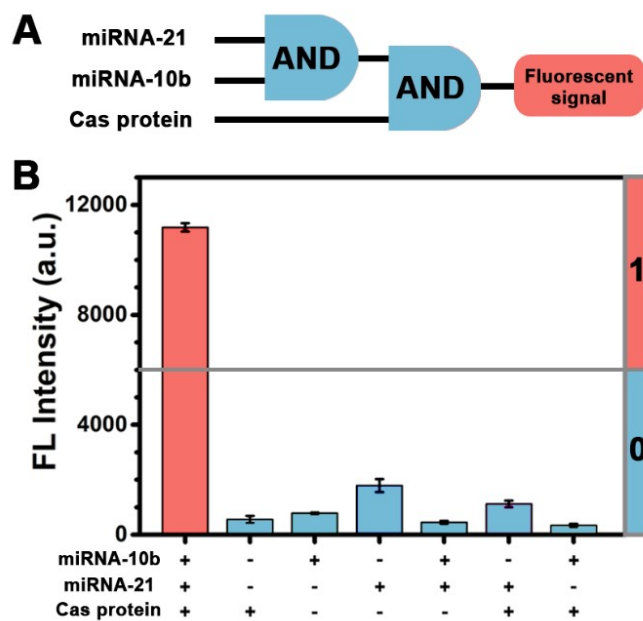

**Figure S3** (A) Schematic of the multi-input design of AND logic gates. (B) Corresponding response of FL signal in each logic function design.

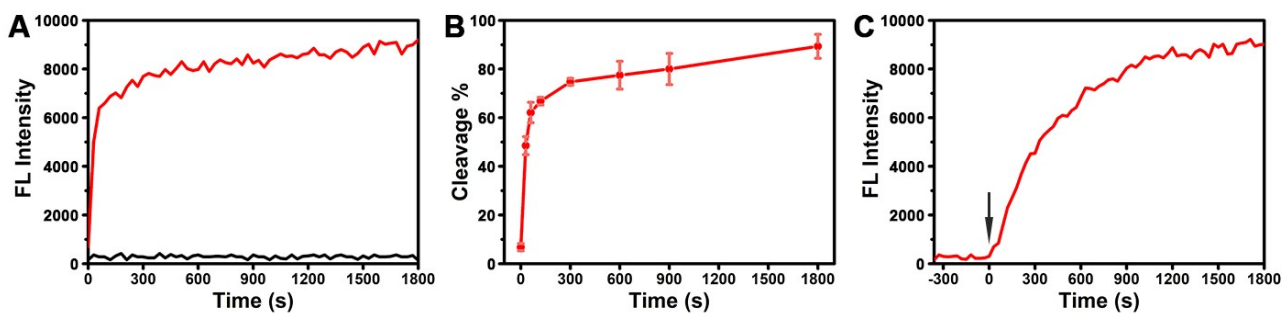

**Figure S4** The FL intensity-Time chart after (A) Cas protein addition or (C) target mitomiR addition. (B) The cleavage kinetics of CRIPR/Cas system.

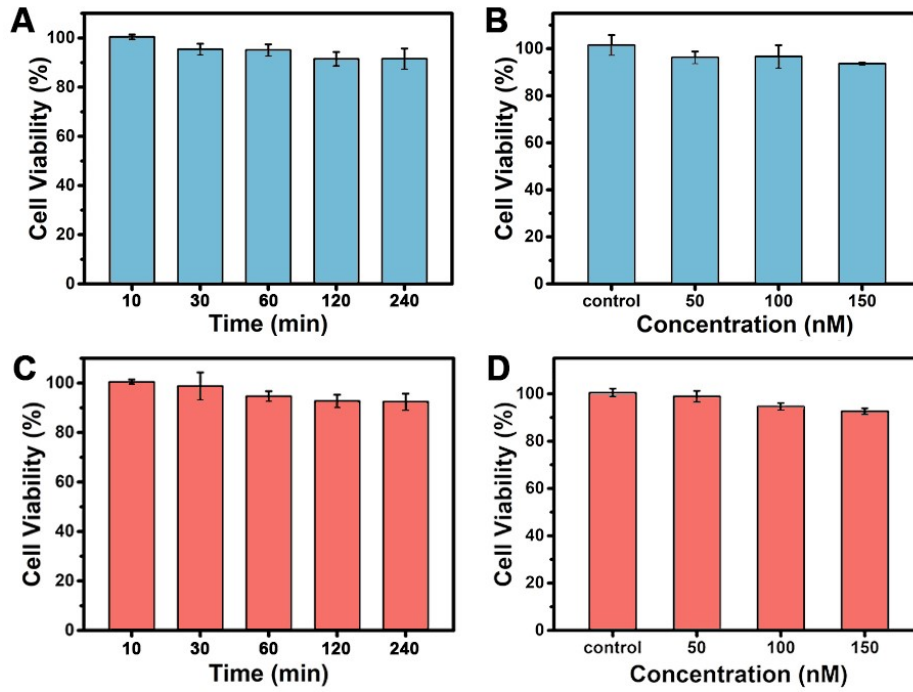

**Figure S5** Cell viability of MCF-7 cells (A) incubated in different time, (B) incubated with different concentration of PDNCs in 30 mins (Consider one-tenth of the added Cas protein concentration as the concentration of PDNC).

Similar with 293T cells in (C) and (D).

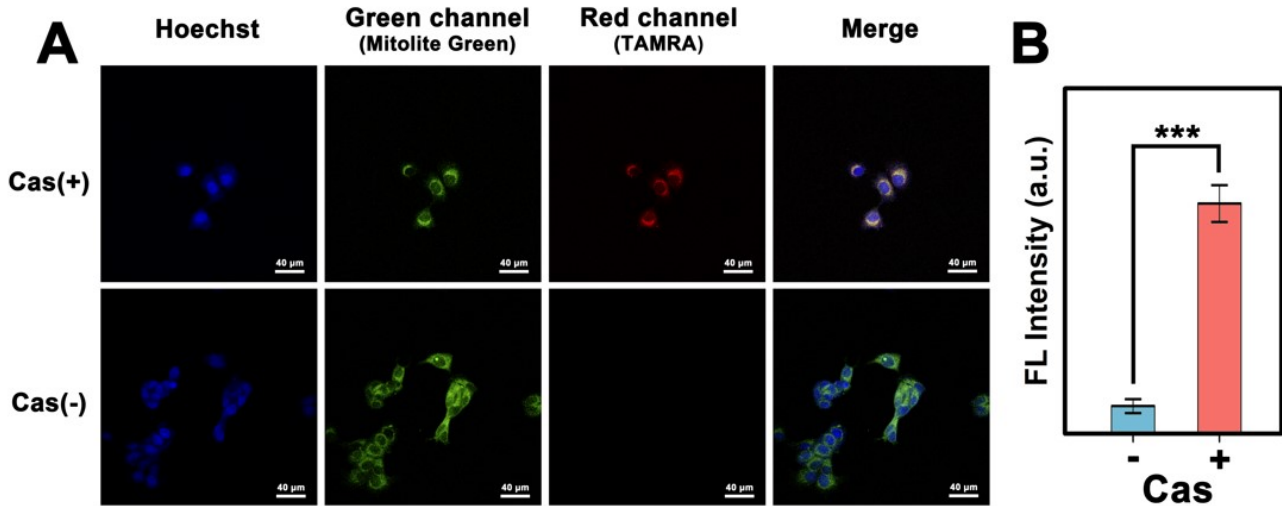

**Figure S6** (A) CLSM images of MCF-7 cells incubated with PDNC probes with or without Cas protein. The scale bar is 40  $\mu$ m. (B) Histogram of the corresponding fluorescence intensity in red channel. Error bars indicate means

$\pm$ SD (n=3). \*\*\* $P$ <0.001.

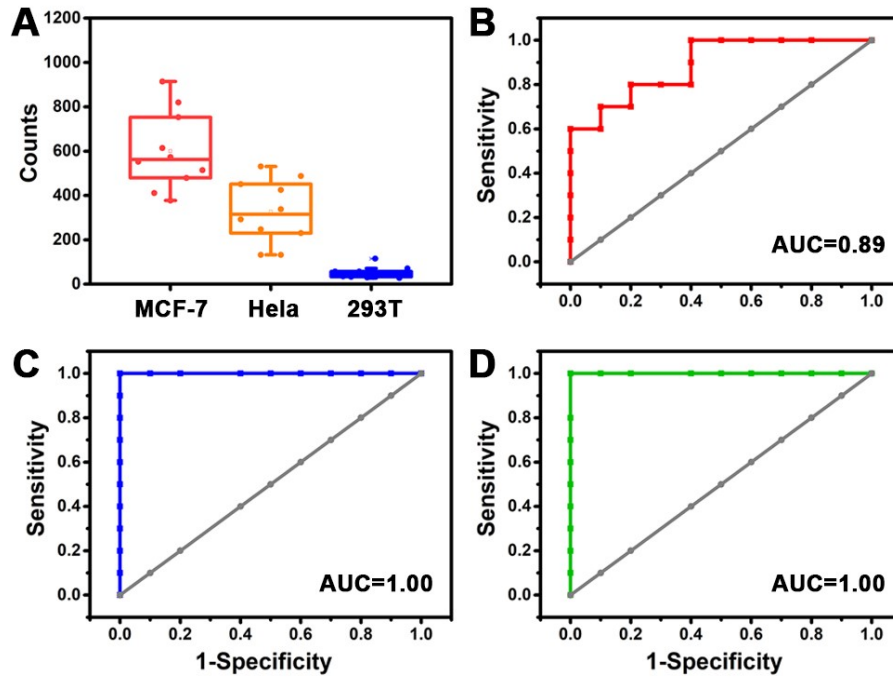

**Figure S7** (A) Boxplot of the single dye molecular spot counts in different cells; ROC curve analysis of the (B) MCF-7 vs HeLa, (C) MCF-7 vs 293T and (D) HeLa vs 293T.

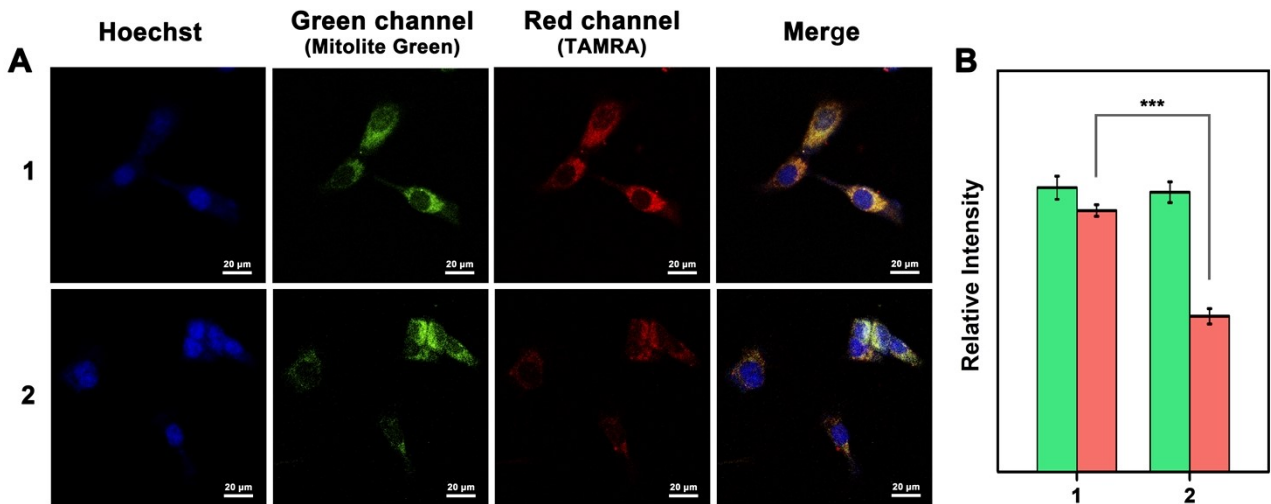

**Figure S8** (A) CLSM images of MCF-7 cells 1) incubated with PDNC probes, 2) directly delivering RNA, DNA and proteins into cells. The scale bar is 20 μm. (B) Histogram of the corresponding fluorescence intensity in green and red channel. Error bars indicate means  $\pm$ SD (n=3). \*\*\* $P$ <0.001.
